# Supplementary material
Source: publisher site journal article supplement (https://www.degruyterbrill.com/publication/isbn/9783110223637/downloadAsset/9783110223637_Inhaltsverzeichnis%20Band%202.pdf)
Supplement: Supplementary file 1 [file 9783110223637_Inhaltsverzeichnis%20Band%202.pdf]

# Inhalt

## Band 2

### Die späte Poetik (1973–1975)

|                  |     |
|------------------|-----|
| Einleitung ..... | 383 |
|------------------|-----|

#### *Westwärts 1 & 2*

|                                                                                                          |     |
|----------------------------------------------------------------------------------------------------------|-----|
| Ein Abend .....                                                                                          | 389 |
| Ballade.....                                                                                             | 397 |
| Canneloni in Olevano.....                                                                                | 403 |
| Chevaux de Trait .....                                                                                   | 410 |
| Chicago .....                                                                                            | 420 |
| La Dame Aux Camelias Potty Greta Garbo Vollmond.....                                                     | 431 |
| Dialog für den Russen Daniil Charms im Dezember.....                                                     | 437 |
| Diese Blöcke der Jahreszeiten.....                                                                       | 446 |
| Dieses Gedicht hat keinen Titel.....                                                                     | 451 |
| Einige sehr populäre Songs.....                                                                          | 461 |
| Ein Gedicht .....                                                                                        | 473 |
| Gedicht .....                                                                                            | 480 |
| Ein gewöhnliches Lied .....                                                                              | 496 |
| Guten Morgen in Köln .....                                                                               | 505 |
| Highkuh, West .....                                                                                      | 511 |
| Hymne auf einen italienischen Platz .....                                                                | 520 |
| Im Voyageurs Apt. 311 East 31st Street, Austin [Teil 3].....                                             | 528 |
| Improvisation 1, 2 & 3 (u. a. nach Han Shan).....                                                        | 534 |
| In London, Flat 6 .....                                                                                  | 541 |
| Einen jener klassischen.....                                                                             | 547 |
| Die Katze .....                                                                                          | 557 |
| Kleiner Nordwind .....                                                                                   | 566 |
| Eine Komposition, für M.....                                                                             | 578 |
| Landschaft .....                                                                                         | 591 |
| Lektüre, 2. März 1776 .....                                                                              | 598 |
| Lied am Samstagabend in Köln .....                                                                       | 605 |
| Lied von den kalten Bauern auf dem kalten Land,<br>Nordwestdeutschland, Krieg und Nachkriegszeiten ..... | 616 |
| Mondlicht in einem Baugerüst.....                                                                        | 626 |

|                                                             |     |
|-------------------------------------------------------------|-----|
| Na, irgendwie.....                                          | 629 |
| Nach Shakespeare .....                                      | 633 |
| Nacht .....                                                 | 641 |
| Noch einmal auf dem Land .....                              | 652 |
| Oh, friedlicher Mittag.....                                 | 659 |
| Die Orangensaftmaschine .....                               | 666 |
| Pawlows Hamburger .....                                     | 672 |
| Plane, Too.....                                             | 680 |
| Politisches Gedicht 13. Nov. 74, BRD .....                  | 688 |
| Reisen in die nördlichen Gärten .....                       | 698 |
| Rolltreppen im August .....                                 | 707 |
| Roma die Notte .....                                        | 717 |
| Samstagabend im Winter.....                                 | 727 |
| Schattenmorellen .....                                      | 743 |
| Ein Skunk.....                                              | 751 |
| Sommer (Aus dem Amerikanischen) .....                       | 758 |
| Sonntagsgedicht .....                                       | 766 |
| Trauer auf dem Wäschendraht im Januar .....                 | 777 |
| Über das einzelne Weggehen .....                            | 785 |
| Ein unkontrolliertes Nachwort zu meinen Gedichten.....      | 787 |
| Variation ohne ein Thema.....                               | 810 |
| Vorbemerkung.....                                           | 817 |
| Westwärts .....                                             | 825 |
| Westwärts, Teil 2.....                                      | 836 |
| Die Fotofolgen aus <i>Westwärts 1 &amp; 2</i> .....         | 847 |
| Fragment zu einigen populären Songs.....                    | 861 |
| Ein friedliches Gedicht .....                               | 872 |
| Die Geschichten .....                                       | 882 |
| <i>Eiswasser an der Guadelupe Str.</i> [Gedichtzyklus]..... | 893 |
| Literaturverzeichnis .....                                  | 909 |
| Register .....                                              |     |
| Namenregister .....                                         | 925 |
| Titelregister .....                                         | 935 |
| Die Autorinnen und Autoren .....                            | 941 |
